# 1     **Transfer learning in single-cell transcriptomics improves data** 2                    **denoising and pattern discovery**

3  
4     Jingshu Wang<sup>1</sup>, Divyansh Agarwal<sup>2</sup>, Mo Huang<sup>1</sup>, Gang Hu<sup>3</sup>, Zilu Zhou<sup>2</sup>, Vincent Conley<sup>4</sup>, Hugh  
5     MacMullan<sup>4</sup>, Nancy R. Zhang<sup>1\*</sup>

6     1) Department of Statistics, University of Pennsylvania, Philadelphia, PA

7     2) Graduate Group in Genomics and Computational Biology, University of Pennsylvania,  
8     Philadelphia, PA

9     3) School of Mathematical Sciences, Nankai University, Tianjin, China

10    4) High Performance Computing and Research IT, The Wharton School, Philadelphia, PA

11  
12  
13    \* Correspondence:

14    Nancy R. Zhang

15    nzh@wharton.upenn.edu

16    (215) 898-8007

17    Department of Statistics

18    The Wharton School

19    University of Pennsylvania

20  
21  
22    **Although single-cell RNA sequencing (scRNA-seq) technologies have shed light on the role**  
23    **of cellular diversity in human pathophysiology<sup>1-3</sup>, the resulting data remains noisy and**  
24    **sparse, making reliable quantification of gene expression challenging. Here, we show that a**  
25    **deep autoencoder coupled to a Bayesian model remarkably improves UMI-based scRNA-seq**  
26    **data quality by transfer learning across datasets. This new technology, SAVER-X,**  
27    **outperforms existing state-of-the-art tools. The deep learning model in SAVER-X extracts**  
28    **transferable gene expression features across data from different labs, generated by varying**  
29    **technologies, and obtained from divergent species. Through this framework, we explore the**  
30    **limits of transfer learning in a diverse testbed and demonstrate that future human**  
31    **sequencing projects will unequivocally benefit from the accumulation of publicly available**  
32    **data. We further show, through examples in immunology and neurodevelopment, that**  
33    **SAVER-X can harness existing public data to enhance downstream analysis of new data,**  
34    **such as those collected in clinical settings.**  
35

1 Highly parallelized scRNA-seq pipelines are now becoming the standard. In many current and  
2 proposed studies, thousands to millions of cells are sequenced, with each cell receiving low  
3 coverage. At low coverages of 500-1000 unique molecular identifiers (UMI) per cell, precise  
4 distinctions between cell states are blurred and genes with low expression cannot be accurately  
5 quantified. To address this challenge, methods have been developed to de-noise and impute  
6 scRNA-seq data <sup>4-7</sup>. These methods, however, may not perform well when sequencing is done at  
7 extremely low depth, or when applied to cell types that are rare. Notably, existing denoising  
8 techniques act solely upon the data from a given study and ignore existing datasets in public  
9 domain, which may contain similar cell types.

10 In light of the Human Cell Atlas initiative <sup>8</sup>, the scientific community will soon have detailed atlases  
11 for each anatomic organ in the human body; for the laboratory mouse, such an atlas (*Tabula Muris*)  
12 was recently unveiled <sup>9</sup>. Accumulation of publicly available scRNA-seq data presents an opportunity  
13 to leverage existing data in the denoising of a new scRNA-seq data set. Yet, it is unclear how much  
14 information can be borrowed across datasets which might be generated using different platforms,  
15 wherein samples are processed differently or at different coverages. Moreover, such transfer  
16 learning must guarantee that the denoising process will not introduce bias or force the new data to  
17 lose its distinctive features and conform to the patterns in existing data.

18 Here we describe a denoising framework, called Single-cell Analysis via Expression Recovery  
19 harnessing eXternal data (SAVER-X). It uses the deep autoencoder, a neural network that achieves  
20 noise reduction by means of an information bottleneck <sup>10</sup>. Consider a target dataset to be denoised.  
21 The autoencoder can be trained on this data starting either from random initialization of the weights,  
22 as in other denoising tools like DCA <sup>7</sup>, or from weights obtained by training on existing public data  
23 sets (pre-training data; Figure 1b) with related cell types. The latter – initialization by pre-trained  
24 weights followed by refinement on the test data – transfers information from public data to a user's  
25 current dataset.

26 A pivotal challenge in transfer learning lies in finding the balance between transferring extensively  
27 and/or scarcely from the pre-training data. While the former would result in the user data losing its

1 own distinctive features, the latter risks producing inappreciable improvements. SAVER-X  
2 adaptively achieves an appropriate amount of information transfer by refining and updating weights  
3 to fit the test data (Figure 1a, item 2A). This drives the model away from the pre-training data.  
4 Subsequently, cross-validation is used to identify genes that are poorly fit by the autoencoder, and  
5 the autoencoder output for these genes is replaced by their mean expression values (Figure 1a,  
6 item 2B). Finally, for each gene in every cell, SAVER-X computes a weighted average of the fitted  
7 value and the observed normalized count <sup>4</sup> (Figure 1a, item 2C). This weighted average is the  
8 posterior mean of the gene's expression in the given cell based on a Bayesian hierarchical model,  
9 assuming the Poisson-alpha technical noise model <sup>11</sup>. SAVER-X outputs the mean denoised  
10 values, which can then feed into downstream analyses.

11 Many core cell types and essential pathways are shared between human and mouse, and,  
12 importantly, experiments can be performed more readily on mice than on human subjects <sup>8,12,13</sup>.  
13 Thus, effective mouse to human transfer learning invites new ways to use mouse as a model  
14 organism. To enable cross-species data sharing, the autoencoder in SAVER-X consists of three  
15 sub-networks with human-specific, mouse-specific and human-mouse shared nodes (Figure 1c).  
16 The human-mouse shared network receives human-mouse homologous genes as input. To adjust  
17 for the differences between data generated using non-UMI- and UMI-based technologies, an  
18 indicator node at the input layer feeds into each sub-network.

19 SAVER-X is publicly available at <http://singlecell.wharton.upenn.edu/saver-x/>, where users can  
20 choose from models pre-trained on 31 mouse tissues and human immune cells. Models jointly  
21 pretrained on cells from both species are also available for brain and pancreatic tissues. For  
22 additional details on SAVER-X architecture and estimation, see Online Methods.

23 Cells that constitute the immune system are implicated in virtually every disease. While  
24 understanding the features of infiltrating immune cells in an inflamed tissue is of critical importance,  
25 their representation is often small in scRNA-seq studies in the absence of flow sorting. Thus,  
26 denoising the observed values without relying on external data becomes especially challenging <sup>14,15</sup>.  
27 We demonstrate that SAVER-X can perform transfer learning for immune cells between healthy and

1 disease conditions. By pre-training SAVER-X on scRNA-seq data from the Human Cell Atlas (HCA)  
2 project <sup>8</sup> (500,000 immunocytes from umbilical cord blood and bone marrow) and 10X Genomics  
3 website <sup>16</sup> (200,000 peripheral blood Mmononuclear cells), we were able to meaningfully improve  
4 the data quality in other scRNA-seq studies that profiled immune cells.

5 First, we evaluated SAVER-X with and without pre-training against existing denoising methods on a  
6 set of purified cells from 9 immune cell types <sup>16</sup>. We created a “test” dataset by randomly selecting  
7 100 cells for each cell type (Online Methods). Among this set of 900 immune cells, with an average  
8 UMI count of roughly 1200 per cell, neither is it easy to visually distinguish NK cells from T-cells, nor  
9 can T-cell subtypes be separated (Figure 2a). SAVER-X imputation of this dataset, without using  
10 any existing data for pretraining, enhances the separation of NK cells from T-cells. Although the  
11 visualization of intra T-cell subtype heterogeneity also improves, the subtypes remain difficult to  
12 identify. The impact of transfer learning becomes apparent when we denoise the test data using  
13 SAVER-X pre-trained on the HCA data (Figure 2a). The Adjusted Rand Index (ARI) improves  
14 significantly as CD8<sup>+</sup> T-cells clearly separate from CD4<sup>+</sup> T-cells, and naïve CD4<sup>+</sup> T-cells become  
15 distinguishable from other subtypes. This observation suggests that significant information about  
16 cell type-specific transcriptional signatures can be transferred between datasets even when the cell  
17 types belong to different tissues and are prepared in different laboratories. Furthermore, SAVER-X  
18 pre-trained on both HCA and 10X data led to a distinct separation between CD4<sup>+</sup> memory T-cells  
19 and regulatory T-cells (T<sub>regs</sub>). The 10X dataset obtained from peripheral blood mononuclear cells  
20 (PBMCs) contains ~120,000 T-cells, and a SAVER-X model trained specifically on these cells  
21 further improves the separation of T-cells subtypes (Fig. 2a). Reliable detection of T-cell subtypes is  
22 crucial to the characterization of a tissue’s immune environment. For instance, naïve CD4<sup>+</sup> T-cells  
23 help maintain immune competence throughout life <sup>17</sup>, and yet the mechanisms underlying their  
24 establishment and maturation remain elusive. SAVER-X allows us to confidently identify this sub-  
25 population and study its homeostasis, which is ultimately critical for clinical applications in both  
26 vaccination and immune reconstitution.

1 The potential of transfer learning in biology hinges on its ability to adapt to diverse and practical  
2 settings. Thus, we explored if SAVER-X can effectively learn from healthy HCA cells in the  
3 denoising of immune cells sequenced from primary breast carcinoma samples from eight treatment-  
4 naïve patients <sup>18</sup>. SAVER-X, pre-trained on publicly available immune cell datasets to denoise the  
5 tumor tissue-resident immune cells, not only allowed us to better characterize immune cell types,  
6 but also clarified the expression patterns of marker genes (Figure 2b, Figure S3) in these patients.  
7 This improved reconstruction of the tumor immune microenvironment typifies the potential gains  
8 achievable by transfer learning from accumulating public data.

9 We further assessed the utility of SAVER-X in scenarios where either the number of cells  
10 sequenced could be small (less than 100), or the sequencing depth might be too low (60 UMIs per  
11 cell; Table S1). Currently, cells with such low coverage are typically discarded. We show that  
12 SAVER-X not only salvages such data, but also extracts useful information about gene-gene  
13 relationships (Figure S2). We benchmarked SAVER-X against other scRNA-seq denoising methods  
14 that do not employ transfer learning, *viz.*, DCA <sup>7</sup>, scImpute <sup>5</sup> and MAGIC <sup>6</sup>, and found that SAVER-X  
15 significantly outperforms existing methods (Figure 2c, Figure S1) in most scenarios. As expected,  
16 for separating major cell types, the benefits of transfer learning diminish when a large number of  
17 cells are sequenced at a sufficiently high depth. As a denoising method, SAVER-X enables  
18 improved gene-level analysis; for instance, as gene expression becomes less sparse, selection of  
19 important regulatory and marker genes becomes more reliable (Figure 2d).

20 Having demonstrated that SAVER-X effectively transfers information across labs and from healthy  
21 to disease settings, we next examined the feasibility of transfer learning across species. Mouse  
22 models have helped scientists understand the basis of several human disorders, and although  
23 transcriptomic patterns in mouse might not always provide a direct route to the cognate human  
24 condition, similarities and disparities of genetic programs, once understood, are likely to provide a  
25 deeper understanding of the fundamental architecture underlying cellular development and  
26 physiology. In this regard, the ability to harness mouse data in the denoising of human data  
27 represents a new mode of cross-species learning. We examined scRNA-seq data from cells in the

1 developing ventral midbrain of both human and mouse, and found that, indeed, SAVER-X pre-  
2 trained on mouse scRNA-seq data enhances the quality of the human data (Figure 3).  
3 First, we reduced the high coverage human ventral midbrain scRNA-seq data by sampling only 10%  
4 of the reads <sup>13</sup>, to a median per cell coverage of 452 UMIs. To compare the gains achievable by  
5 intra- and inter-species transfer learning, we split the human cells randomly into two groups, down-  
6 sampled one group and used the other group as the pre-training data (Figure 3a). SAVER-X pre-  
7 trained on the matched mouse brain cells led to a distinct improvement in cell type identification for  
8 human compared with the un-pretrained model, affirming the potential of transfer learning across  
9 species (Figure 3b). We found that a model jointly pre-trained on both human and mouse data  
10 further augments the human scRNA-seq data quality compared with pre-training on the human cells  
11 alone. Remarkably, pre-training SAVER-X on cells from regions other than the ventral mid-brain  
12 using the *Tabula Muris* <sup>9</sup> also improved the ARI (Figure 3b). We then pre-trained SAVER-X on three  
13 human non-UMI datasets <sup>19-21</sup>, and found that the model jointly pre-trained using both the non-UMI  
14 human cells and mouse cells outperforms training on either species alone (Figure S4a). These  
15 observations suggest that SAVER-X prevents negative transfer of information between species by  
16 harnessing the heterogeneity among public datasets. Data heterogeneity forces SAVER-X to learn  
17 robust low-dimensional representation of information, which likely contains the true biological  
18 signals that are shared across studies.

19 To further demonstrate that SAVER-X does not unnaturally bias data denoising, we examined  
20 whether a model pre-trained on mouse data affects human-specific patterns. We denoised human  
21 scRNA-seq data using the matched mouse data, and then compared the log fold-change of the  
22 genes differentially expressed between human and mouse for each cell type before and after  
23 denoising. We found that the fold changes are indeed preserved, suggesting that SAVER-X  
24 introduces negligible bias (Figure 3c). On the other hand, simply relying on an autoencoder, without  
25 gene filtering or Bayesian shrinkage, reduces the fold change between human and mouse for some  
26 genes in some cell types (Figure S4b). This highlights the importance of balancing the autoencoder  
27 predictions against the observed data to prevent bias.

1 Taken together, our results demonstrate that the transfer learning framework employed by SAVER-  
2 X can leverage existing scRNA-seq datasets to improve the quality of new scRNA-seq data across  
3 UMI-based sequencing platforms, species, organs and cell types. At its core, SAVER-X trains a  
4 deep neural network on scRNA-seq data across a range of study designs and applies this model to  
5 new data to strengthen shared biological patterns. This general framework for inferring “true”  
6 relationships from raw and error-prone experimental data will be broadly applicable in other high-  
7 throughput settings. Through applications in immunology and developmental neuroscience, we  
8 show that SAVER-X can improve cell type classification and gene expression characterization in  
9 both healthy and disease settings. With increasing accumulation of publicly available data, SAVER-  
10 X will increase in generalization accuracy and in tissue- and cell-type specificity. A technology like  
11 SAVER-X changes the approach to scRNA-seq data analysis from a process of study-specific  
12 quality control and statistical modeling to an automated process of cross-study data integration and  
13 information sharing.

14

## 15 **Methods**

### 16 **Collection of public datasets**

17 The Human Cell Atlas (HCA) dataset was downloaded from the HCA data portal  
18 (<https://preview.data.humancellatlas.org/>) and the PBMC data was downloaded from the 10X  
19 website (<https://support.10xgenomics.com/single-cell-gene-expression/datasets>, Table S2). The  
20 purified data for each immune cell type was also downloaded from the 10X website <sup>16</sup>. The breast  
21 cancer data <sup>18</sup> was downloaded from GEO (GSE114725). The developing midbrain data <sup>13</sup> was  
22 downloaded from GEO (GSE76381). For other mouse developing brain datasets, we include cells  
23 from neonatal and fetal brain tissues in the *Tabula Muris* <sup>9</sup> data (GSE108097). For the other non-  
24 UMI human developing brain datasets, we include three: GSE75140 <sup>20</sup>, GSE104276 <sup>21</sup> and  
25 SRP041736 <sup>19</sup>. No filtering is done on the original data and all genes and cells provided in the  
26 original datasets were used by SAVER-X.

1 A complete list of the pre-training datasets used for pre-training the models on the SAVER-X  
2 website is provided in Table S2.

### 3 **Details of SAVER-X**

4 SAVER-X uses a Bayesian hierarchical model to combine evidence from the raw read counts of a  
5 new data set with predictions made by an autoencoder. The autoencoder can be trained exclusively  
6 on the new data set, or first pre-trained on existing data sets and then on the new data set. The  
7 autoencoder used by SAVER-X has three subnetworks, as shown in Figure 1a, with one  
8 subnetwork taking human genes as input, one subnetwork taking mouse genes as input, and one  
9 subnetwork taking shared human-mouse homologous genes as input. 21183 and 21122 genes are  
10 used for human and mouse (Supplementary Data, Supplementary Note), respectively, as input and  
11 output nodes of the autoencoder. By current annotations using the `getLDS()` function in the `bioMart` R  
12 package, 15494 genes have homologs shared between the two species (Supplementary Data,  
13 Supplementary Note). For each sub-network, the number of nodes in the encoding and decoding  
14 layers are, successively, 128, 64, 32, 64, and 128. If only human data are available, only the human  
15 and shared sub-network weights are updated. Similarly, if only mouse data are available, only the  
16 mouse and shared sub-network weights are updated.

17 For UMI datasets, let the raw UMI count for each cell  $c$  and gene  $g$  be  $x_{cg}$ , then the input expression  
18 levels are normalized by library size, re-scaled and log-transformed using formula:  $\tilde{x}_{cg} =$   
19  $\log(x_{cg}/l_c \times 10000 + 1)$  where  $l_c = \sum_g x_{cg}$  is the library size of cell  $c$ . For non-UMI datasets, TPM  
20 for each cell  $c$  and gene  $g$  are denoted as  $x_{cg}$ , and then the  $x_{cg}$  are transformed using the same  
21 formula as that for UMI. If a gene is missing in the dataset, the input is set to 0 while the  
22 corresponding output node is not accounted for in the loss function. Specifically, let the output value  
23 for gene  $g$  be defined as  $\hat{x}_{cg}$ , which we refer to as the autoencoder prediction. Conditional on the  
24 prediction  $\hat{x}_{cg}$ , the observed UMI count is assumed to follow a Negative Binomial distribution. Thus,  
25 for each cell  $c$ , the loss function for UMI-based counts is defined as the sum of log likelihoods:



$$1 \quad L(x_c, \hat{x}_c) = \sum_{\text{node } g \text{ presents in the dataset}} \log[\text{NB}(x_{cg}; l_c \hat{x}_{cg}, \theta_g^U)]$$

2 On the other hand, TPM data is assumed to approximately follow a zero inflated Negative Binomial  
3 distribution (although TPM is not integer-valued, the likelihood function can still be computed) and  
4 the loss is defined as:

$$5 \quad L(x_c, \hat{x}_c) = \sum_{\text{node } g \text{ presents in the dataset}} \log[\text{ZINB}(x_{cg}; \hat{x}_{cg}, \theta_g^{NU}, \pi_{cg})]$$

6 where  $\text{NB}(x; \mu, \theta)$  and  $\text{ZINB}(x; \mu, \theta, \pi)$  are the density of Negative Binomial and zero-inflated  
7 Negative Binomial distributions (see Supplementary Note). A separate gene-specific dispersion  
8 parameter  $\theta_g^U$  and  $\theta_g^{NU}$  is dedicated for UMI and non-UMI input, respectively. For non-UMI data, the  
9 gene- and cell-specific zero inflation parameter is defined as

$$10 \quad \frac{\pi_{cg}}{1 - \pi_{cg}} = w_g \log \hat{x}_{cg} + b_g$$

11 Our implementation of the autoencoder builds on top of the source code of DCA <sup>7</sup>, using its library  
12 functions.

13 Although SAVER-X accepts pre-training data both with and without UMI, **the target data must**  
14 **have UMI**. When SAVER-X is applied to the denoising of a UMI-based target data matrix, the  
15 following steps are applied (Figure 1a): (1) The autoencoder is fit on the target data, optionally  
16 starting with a user-selected pre-trained model. (2) Cross-validation is applied to filter out genes  
17 that cannot be predicted well by the autoencoder. Specifically, the target data is randomly split into  
18 held-in and held-out cell sets, the autoencoder is trained on the held-in set and then used to make  
19 predictions on the held-out set. For a specific gene  $g$ , let the normalized predictions using the held-  
20 in set trained model on a held-out cell  $c$  is  $\hat{x}_{cg}$  and let the held-in sample mean for the library-size  
21 normalized counts be  $\mu_g$ . Then a gene is unpredictable if the Poisson deviance of the predictions  
22 and original UMI counts of the held-out samples is larger than that of the held-in sample mean and  
23 held-out original UMI counts, equivalently:

$$1 \quad - \sum_{c \text{ is a held-out cell}} [x_{cg} \log(l_c \hat{x}_{cg} + \varepsilon) - l_c \hat{x}_{cg}] > - \sum_{c \text{ is a held-out cell}} [x_{cg} \log(l_c \mu_g + \varepsilon) - l_c \mu_g]$$

2 where  $\varepsilon = 10^{-10}$  to avoid taking the log of zeros. After unpredictable genes are identified, the  
 3 autoencoder is trained again on all the cells, but the predicted values of the unpredictable genes or  
 4 genes that are not present in the nodes are replaced with the sample mean of library size  
 5 normalized UMI counts. (3) After we obtain these predicted values, we apply empirical Bayes  
 6 shrinkage, following the model used by SAVER<sup>4</sup>. In SAVER, let  $\lambda_{cg}$  be the true relative expression  
 7 level of the gene that we want to recover, then we assume

$$8 \quad x_{cg} \sim \text{Poisson}(l_c \lambda_{cg}), \quad \lambda_{cg} \sim \text{Gamma}(\alpha_{cg}, \beta_{cg})$$

9 where  $\beta_{cg}$  is the rate parameter,  $\alpha_{cg} = \hat{x}_{cg} \beta_{cg}$  is the shape parameter and  $\hat{x}_{cg}$  is the filtered  
 10 autoencoder prediction. The final denoised expression level of a gene in each cell is a weighted  
 11 average of the autoencoder predicted value and its observed UMI count:

$$12 \quad \hat{\lambda}_{cg} = \frac{l_c}{l_c + \hat{\beta}_{cg}} \frac{x_{cg}}{l_c} + \frac{\hat{\beta}_{cg}}{l_c + \hat{\beta}_{cg}} \hat{x}_{cg}$$

13 Where  $\hat{\beta}_{cg}$  is obtained by maximizing the likelihood in SAVER.

#### 14 **Data denoising using other bench-marking methods**

15 MAGIC<sup>6</sup> was performed using the R version 1.3.0 on the square root transformed mean library-size  
 16 normalized expression. scImpute<sup>5</sup> version 0.0.9 was performed on the unnormalized expression  
 17 values setting Kcluster = 9. DCA<sup>7</sup> version 0.2.2 was performed on the unnormalized expression  
 18 values and the library-size normalized expression output was used for downstream analysis.

#### 19 **Generating down-sampled datasets**

20 For an observed UMI count data matrix, we down-sample the reads to obtain a data set of the same  
 21 gene and cell numbers but with lower quality. For cell  $c$  and gene  $g$ , the down-sampled value  $y_{cg}$  is  
 22 generated by independently drawing from a Poisson distribution with  $y_{cg} \sim \text{Poisson}(\tau_c x_{cg})$  where  $\tau_c$

1 is a cell-specific efficiency loss. To mimic variation in efficiency across cells, we sampled  $\tau_c$  as  
2 follows:

3 1. 10% efficiency:  $\tau_c \sim \text{Gamma}(10, 100)$ , used on the mouse midbrain data <sup>13</sup>

4 2. 5% efficiency:  $\tau_c \sim \text{Gamma}(5, 100)$ , used on the 10X PBMC data <sup>16</sup>

## 5 **t-SNE visualization and cell clustering**

6 We used Seurat version 2.0 to perform cell clustering and t-SNE visualization according to the  
7 workflow detailed at ([https://satijalab.org/seurat/pbmc3k\\_tutorial.html](https://satijalab.org/seurat/pbmc3k_tutorial.html)). For all analyses, we set the  
8 number of principal components to 15. For cell clustering using Seurat, resolution is set to be 1.6,  
9 1.2, 0.8 and 0.8 for each of the four experiments (90 cells, 900 cells, 9000 cells and 9000 cells with  
10 down-sampled reads) of the PBMC data and kept the same on all the methods compared. The  
11 resolution is set to 1 for the cell clustering of the midbrain data <sup>13</sup>. The adjusted Rand Index (ARI) is  
12 computed using R package mclust.

## 13 **Differential expression analysis**

14 Differentially expressed genes between human and mouse for each cell type of the developing  
15 midbrain are obtained also using Seurat 2.0, where the Wilcoxon rank sum test is used. P-value  
16 adjustment is performed using Bonferroni correction based on the total number of genes in the  
17 dataset. A gene is selected as differentially expressed if its adjusted p-value is  $\leq 0.05$  and the  
18 absolute log fold change is  $\geq 0.25$ .

19

## 20 **Competing Interests**

21 The authors declare no competing interests

22

## 23 **References**

- 1 1. Patel, A. P. *et al.* Single-cell RNA-seq highlights intratumoral heterogeneity in primary  
2 glioblastoma. *Science (80-. )*. **344**, 1396–1402 (2014).
- 3 2. Segerstolpe, Å. *et al.* Single-Cell Transcriptome Profiling of Human Pancreatic Islets in  
4 Health and Type 2 Diabetes. *Cell Metab.* **24**, 593–607 (2016).
- 5 3. Guo, X. *et al.* Global characterization of T cells in non-small-cell lung cancer by single-cell  
6 sequencing. *Nat. Med.* **24**, 978–985 (2018).
- 7 4. Huang, M. *et al.* SAVER: Gene expression recovery for single-cell RNA sequencing. *Nat.*  
8 *Methods* **15**, 539–542 (2018).
- 9 5. Li, W. V. & Li, J. J. An accurate and robust imputation method scImpute for single-cell RNA-  
10 seq data. *Nat. Commun.* **9**, 1–9 (2018).
- 11 6. van Dijk, D. *et al.* Recovering Gene Interactions from Single-Cell Data Using Data Diffusion.  
12 *Cell* **174**, 716–729.e27 (2018).
- 13 7. Eraslan, G., Simon, L. M., Mircea, M., Mueller, N. S. & Theis, F. J. DCA: Single cell RNA-seq  
14 denoising using a deep count autoencoder. *bioRxiv* 300681 (2018). doi:10.1101/300681
- 15 8. Regev, A. *et al.* The human cell atlas. *Elife* **6**, 1–30 (2017).
- 16 9. Han, X. *et al.* Mapping the Mouse Cell Atlas by Microwell-Seq. *Cell* **172**, 1091–1097.e17  
17 (2018).
- 18 10. Hinton, G. E. & Salakhutdinov, R. R. Reducing the Dimensionality of Data with Neural  
19 Networks. *Science (80-. )*. **313**, 504–507 (2006).
- 20 11. Wang, J. *et al.* Gene expression distribution deconvolution in single-cell RNA sequencing.  
21 *Proc. Natl. Acad. Sci.* **115**, E6437–E6446 (2018).
- 22 12. Baron, M. *et al.* A Single-Cell Transcriptomic Map of the Human and Mouse Pancreas  
23 Reveals Inter- and Intra-cell Population Structure. *Cell Syst.* **3**, 346–360 (2016).
- 24 13. La Manno, G. *et al.* Molecular Diversity of Midbrain Development in Mouse, Human, and

- 1 Stem Cells. *Cell* **167**, 566–580.e19 (2016).
- 2 14. Neu, K. E., Tang, Q., Wilson, P. C. & Khan, A. A. Single-Cell Genomics: Approaches and  
3 Utility in Immunology. *Trends Immunol.* **38**, 140–149 (2017).
- 4 15. Nguyen, A., Khoo, W. H., Moran, I., Croucher, P. I. & Phan, T. G. Single cell RNA sequencing  
5 of rare immune cell populations. *Front. Immunol.* **9**, (2018).
- 6 16. Zheng, G. X. Y. *et al.* Massively parallel digital transcriptional profiling of single cells. *Nat.*  
7 *Commun.* **8**, 1–12 (2017).
- 8 17. Silva, S. L. & Sousa, A. E. Establishment and Maintenance of the Human Naïve CD4+ T-Cell  
9 Compartment. *Front. Pediatr.* **4**, 1–10 (2016).
- 10 18. Azizi, E. *et al.* Single-Cell Map of Diverse Immune Phenotypes in the Breast Tumor  
11 Microenvironment. *Cell* **174**, 1293–1308.e36 (2018).
- 12 19. Pollen, A. A. *et al.* Low-coverage single-cell mRNA sequencing reveals cellular heterogeneity  
13 and activated signaling pathways in developing cerebral cortex. *Nat. Biotechnol.* **32**, 1053–  
14 1058 (2014).
- 15 20. Camp, J. G. *et al.* Human cerebral organoids recapitulate gene expression programs of fetal  
16 neocortex development. *Proc. Natl. Acad. Sci.* **112**, 201520760 (2015).
- 17 21. Zhong, S. *et al.* A single-cell RNA-seq survey of the developmental landscape of the human  
18 prefrontal cortex. *Nature* **555**, 524–528 (2018).

19

20

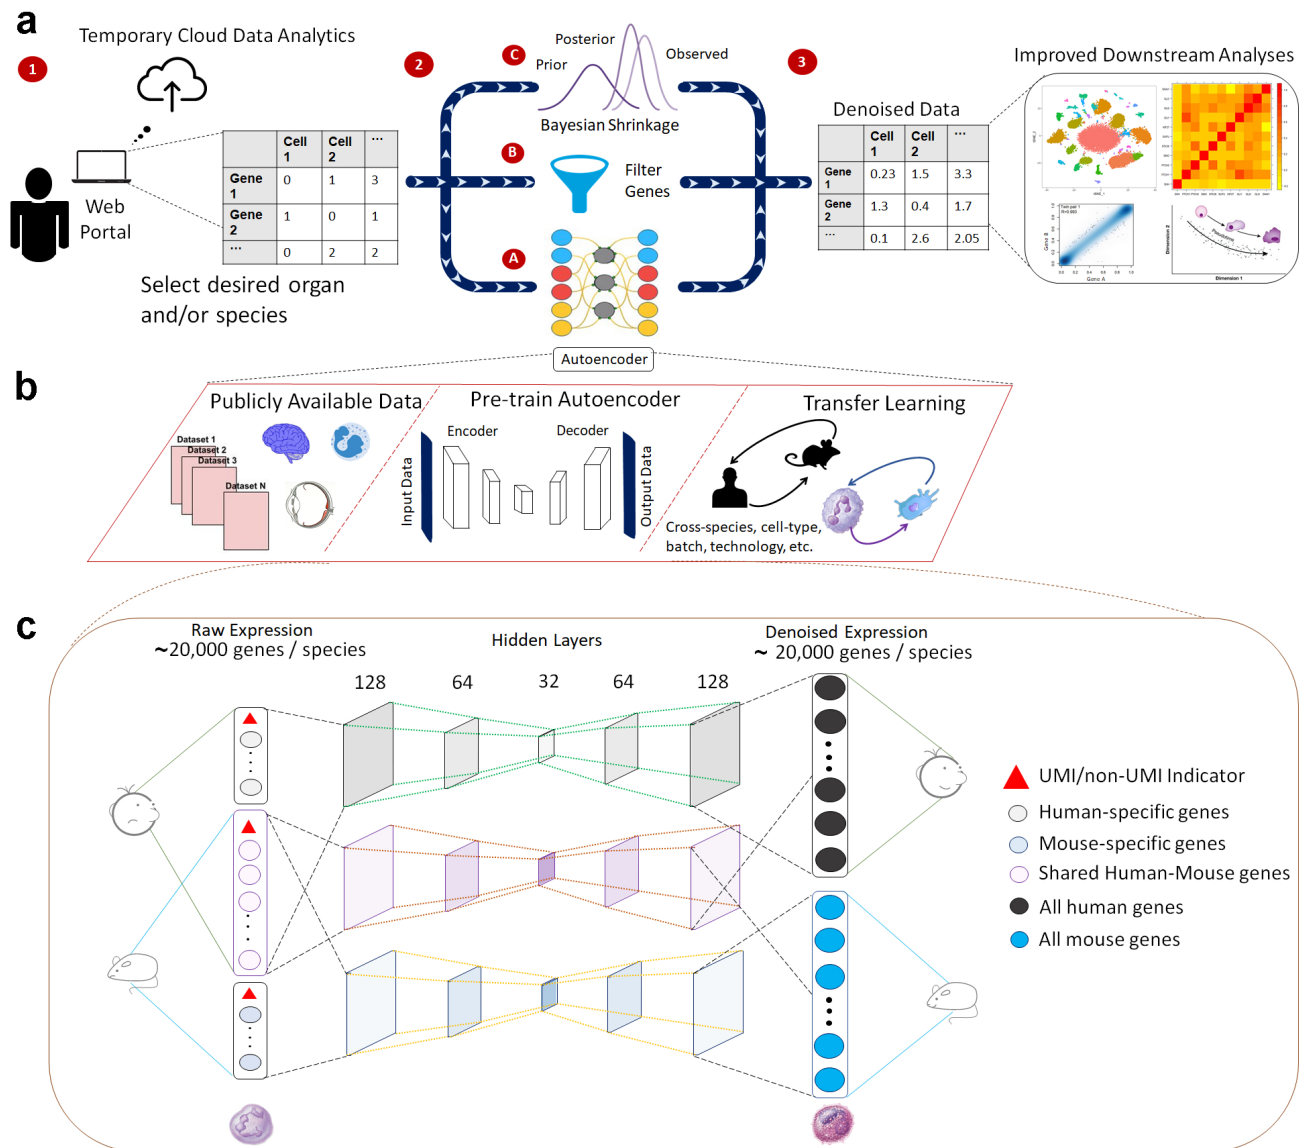

**Figure 1: Outline of the SAVER-X transfer learning framework.**

**a)** Online learning: User uploads data (UMI count matrix) to the SAVER-X web portal (1) and chooses a desired pre-trained model (2A). The model is trained with the user data. Filtering of unproductive genes (2B) and empirical Bayes shrinkage (2C) are then performed to prevent overfitting. User finally receives a denoised data matrix of the same size as the input data matrix (3), which can be used for downstream analysis. **b)** Offline autoencoder pre-training: for each species and each organ/cell-type, public datasets are collected and combined to train an autoencoder to generate pre-trained weights. **c)** Architecture of the autoencoder: The autoencoder allows cells from both human and mouse, both with and without UMI, to be used for pre-training. However, For each species, there are about 20,000 input nodes accepting raw gene expression values; approximately two-thirds of the input nodes are shared between species for genes with homologs.

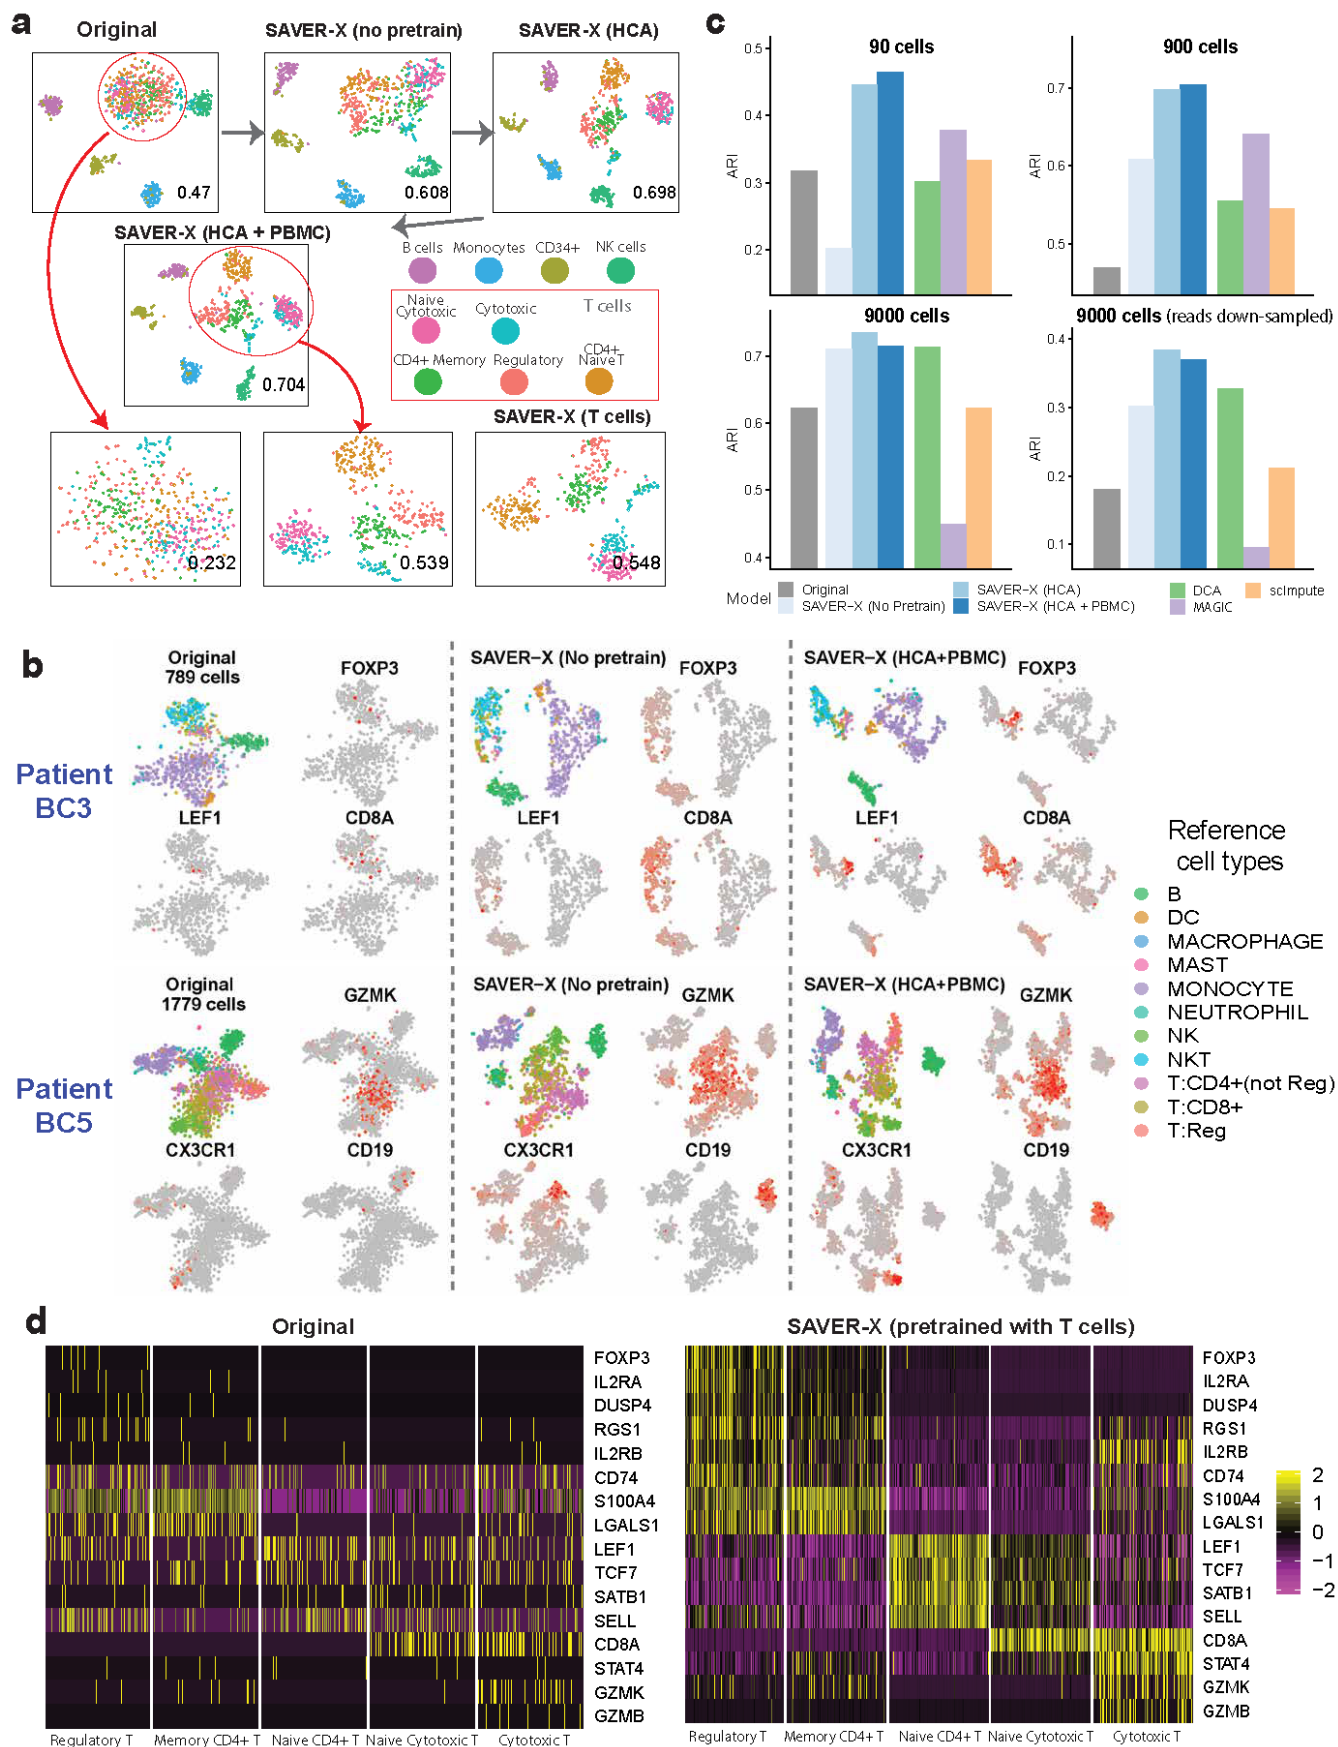

**Figure 2: SAVER-X de-noising of immune cell subsets**

**a)** t-SNE plots of 900 immune cells, colored by known cell-type labels, from the original data, and the denoised data using de-noising models with and without transfer learning are shown. The number at the right-bottom corner of each plot is the adjusted rand index (ARI). **b)** Infiltrating immune cells in resected breast carcinoma from two breast cancer patients from Azizi et al. The three panels show visualizations using original data, denoised values by SAVER-X without pre-training, and denoised values by SAVER-X pre-trained on HCA and 10X PBMC data. The t-SNE plots show separation between cell types (cell labels are obtained from the original paper). Feature plots show the expression of known marker genes, and a darker red color represents a relatively higher expression level. **c)** The performance of SAVER-X is benchmarked against existing imputation methods using clustering ARI. Each experiment varies the number of cells and the sequencing coverage. **d)** Relative expression of known marker genes in 5000 PBMC T cells (from the 9000 PBMC cells experiment) before and after denoising using SAVER-X.



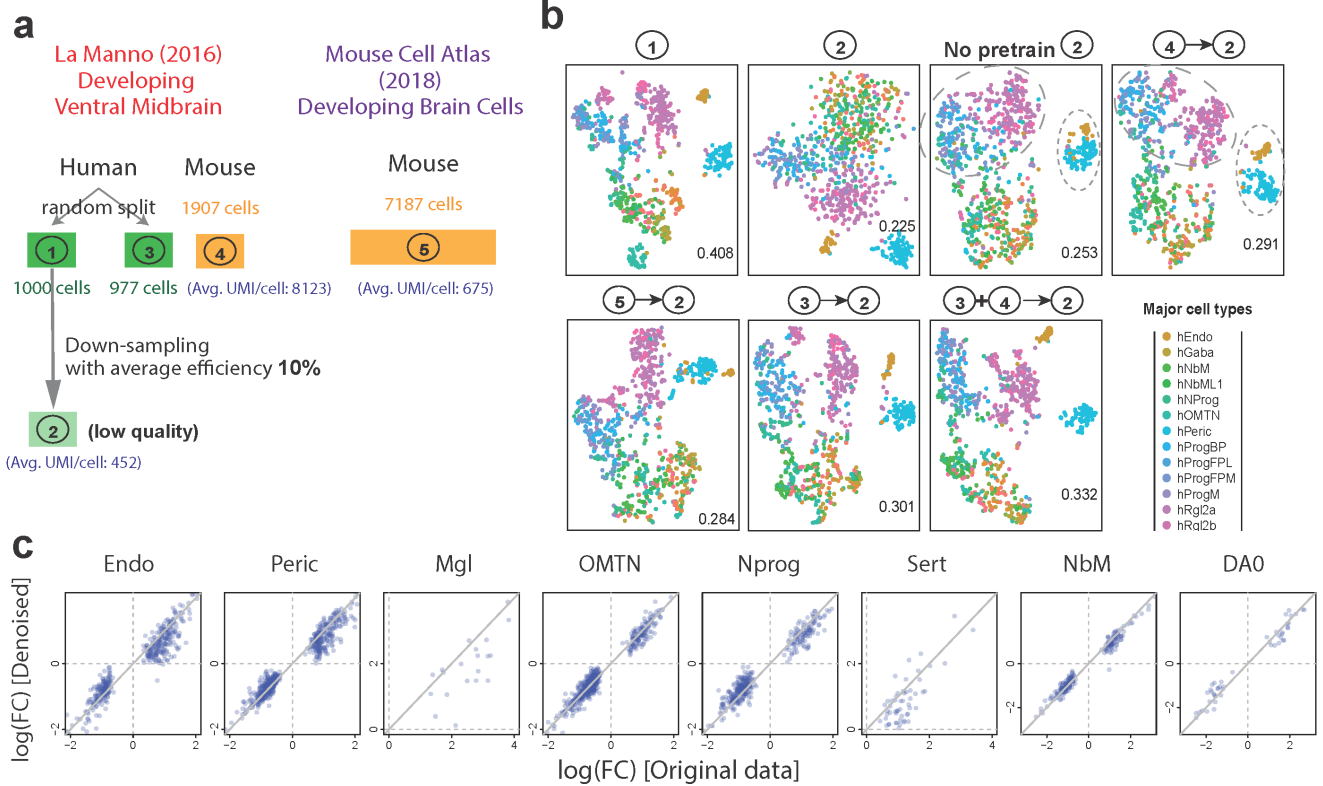

**Figure 3: Mouse to human transfer learning improves denoising of single cell expression within the developing ventral midbrain.**

**a)** Summary of datasets and the split-sample experiment design. **b)** t-SNE plots for the original data, the down-sampled data, and the SAVER-X denoised data are shown. No-pretrain denotes that the model uses randomly-initialized weights. Other scenarios where weights are initialized on mouse ventral midbrain cells (4->2), developing brain cells from mouse cell atlas (5->2), human ventral midbrain cells (3->2), and human and brain ventral midbrain cells (3+4->2) are also shown. Reference cell labels are obtained from the original paper. The ARI displayed at the bottom-right corner of each plot is computed against the original labels. **c)** Log fold-change between human and mouse data in 8 major cell types. The X-axis shows the log fold-change computed using the original human data, and the Y-axis denotes the log fold-change computed using the denoised and down-sampled human data, wherein the denoising is done by SAVER-X pretrained with mouse ventral midbrain cells (4->2 model in b). Each dot corresponds to a differentially expressed gene between human and mouse in that tissue.
